# Supplementary material for: Nitric oxide-scavenging micelles alleviate airway inflammation in asthma via Th2 cytokine modulation
Source: Royal Society of Chemistry journal article supplement (doi:10.1039/d4ma01135j), 2025-01-01
Supplement: d4ma01135j1.pdf [file d4ma01135j1.pdf]

## **Nitric Oxide-Scavenging Micelles Alleviate Airway Inflammation in Asthma via Th2 Cytokine Modulation**

Daoxiang Rong<sup>1,2</sup>, Shanshan Fang<sup>3,2</sup>, Shaohu Huo<sup>1</sup>, Paiyu Lin<sup>1</sup>, Jian Cheng<sup>4\*</sup>, Jingfang Hong<sup>3\*</sup>, Shenggang Ding<sup>1\*</sup>

<sup>1</sup>Department of Pediatrics, the First Affiliated Hospital of Anhui Medical University, Hefei, Anhui, 230022, China

<sup>2</sup>Department of Pediatrics, the First Affiliated Hospital of Bengbu Medical University, Bengbu, Anhui, 233004, China

<sup>3</sup>School of Nursing of Anhui Medical University, Hefei, Anhui, 230022, China

<sup>4</sup>Suzhou Institute for Advanced Research, University of Science and Technology of China, Suzhou, 215123, China

\*Corresponding authors.

E-mail addresses: [dingsg@ahmu.edu.cn](mailto:dingsg@ahmu.edu.cn); [hjftong@gmail.com](mailto:hjftong@gmail.com); [cjivn@ustc.edu.cn](mailto:cjivn@ustc.edu.cn).

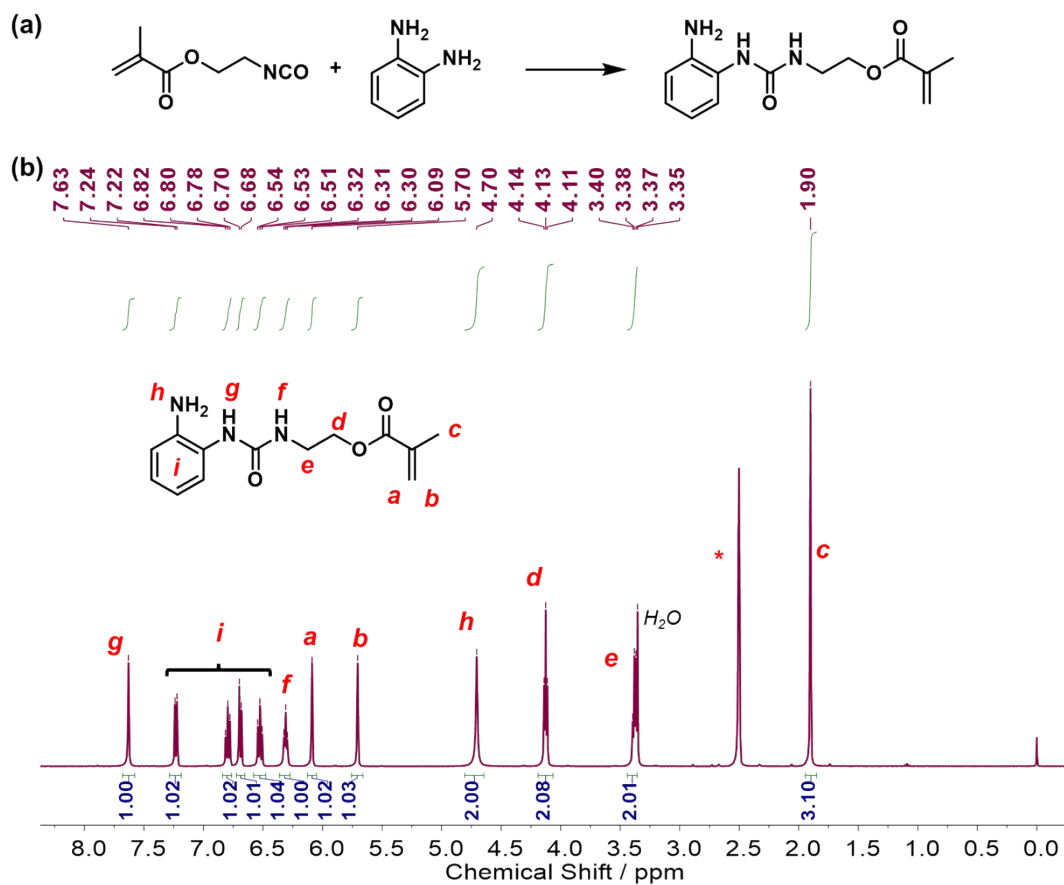

**Figure S1.** (a) Synthetic route of APUMA. (b)  $^1\text{H}$  NMR in  $\text{DMSO}-d_6$  for APUMA.

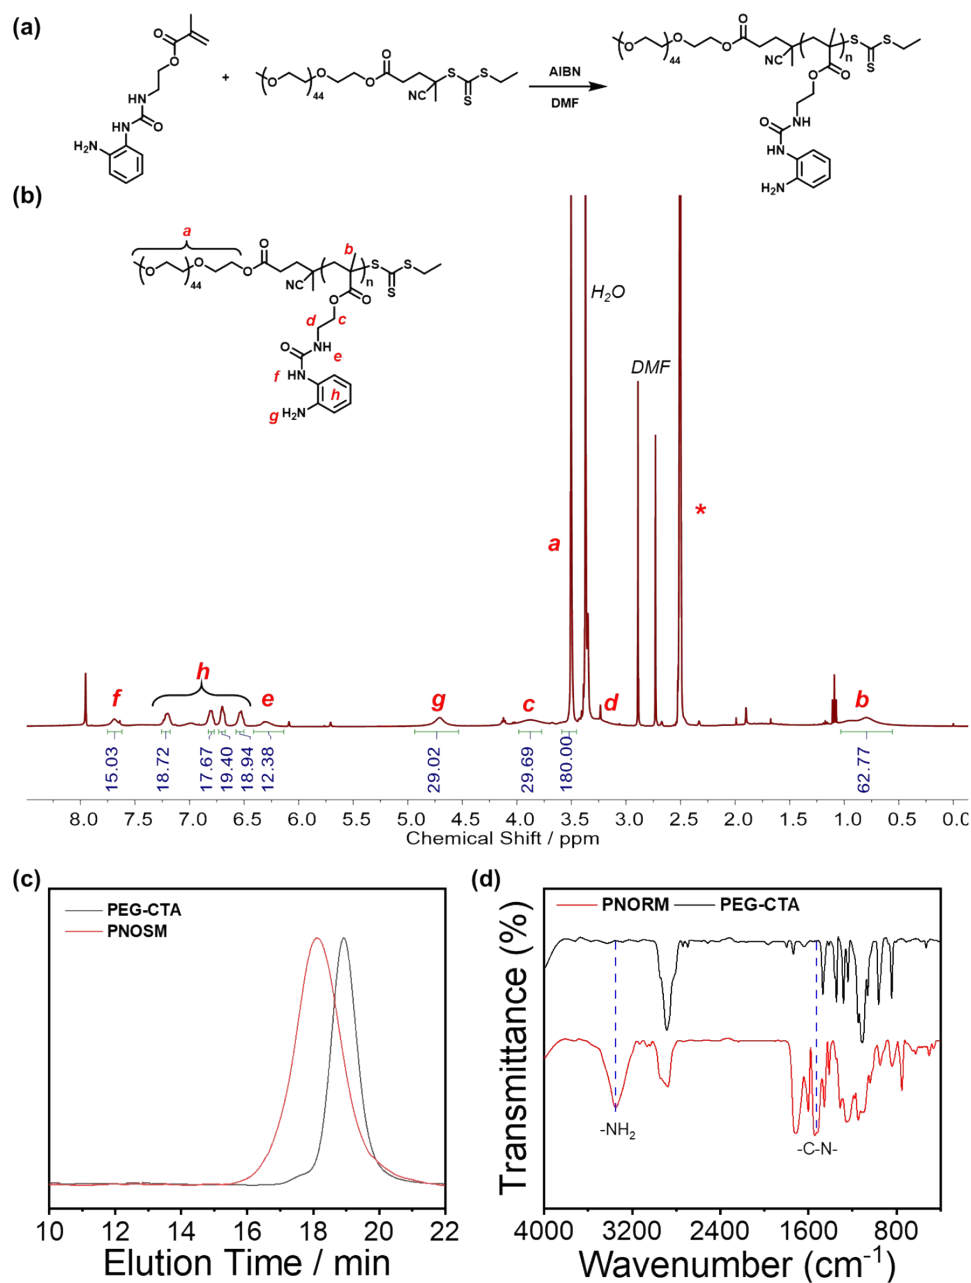

**Figure S2.** (a) Synthetic routes of PNOSM diblock copolymers. (b)  $^1\text{H}$  NMR spectra of PNOSM diblock copolymers. (c) GPC traces of PNOSM diblock copolymers. (d) FTIR spectra recorded of PNOSM and PEG-CTA.

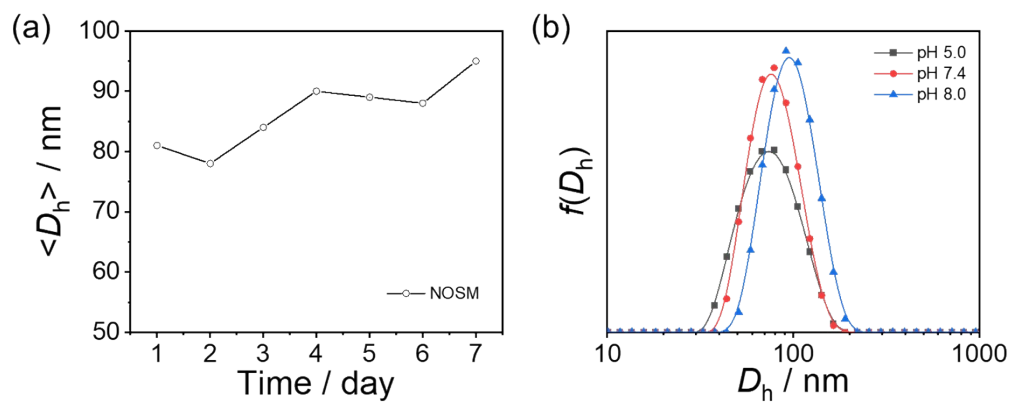

**Figure S3.** (a) Size variation of NOSM over 7 days at 37 °C. (b) NOSM under varying pH conditions.

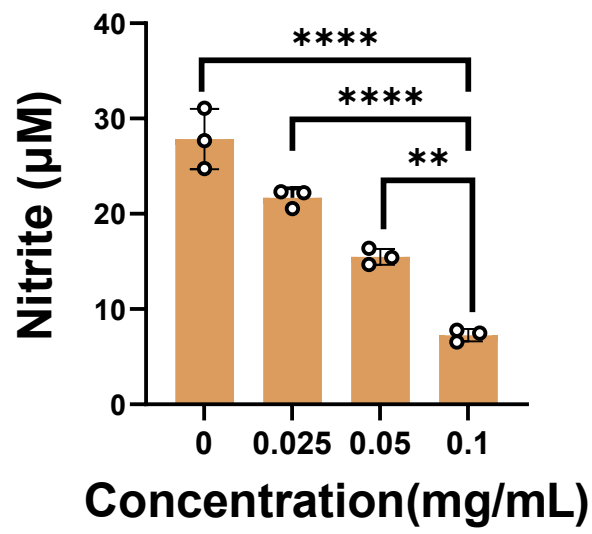

**Figure S4.** NOSM effectively clears NO in vitro, Raw264.7 cells were treated with different concentration of NOSM (0 - 0.1 mg/mL) (n=3).

(a)

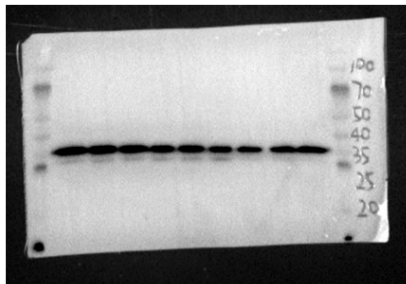

**Gapdh**

(b)

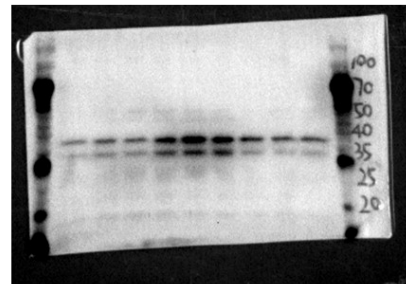

**Sirt6**

**Figure S5.** Raw data of the Western blot in Figure 5 c,d.

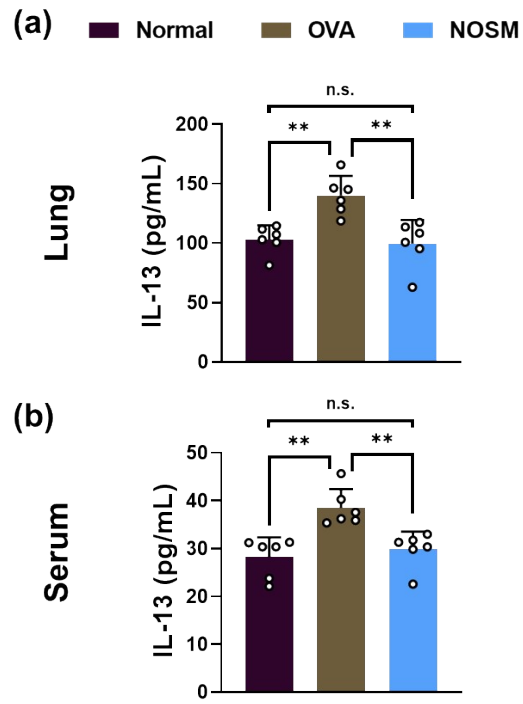

**Figure S6.** IL-13 concentrations in lung tissues (a) and serum (b).

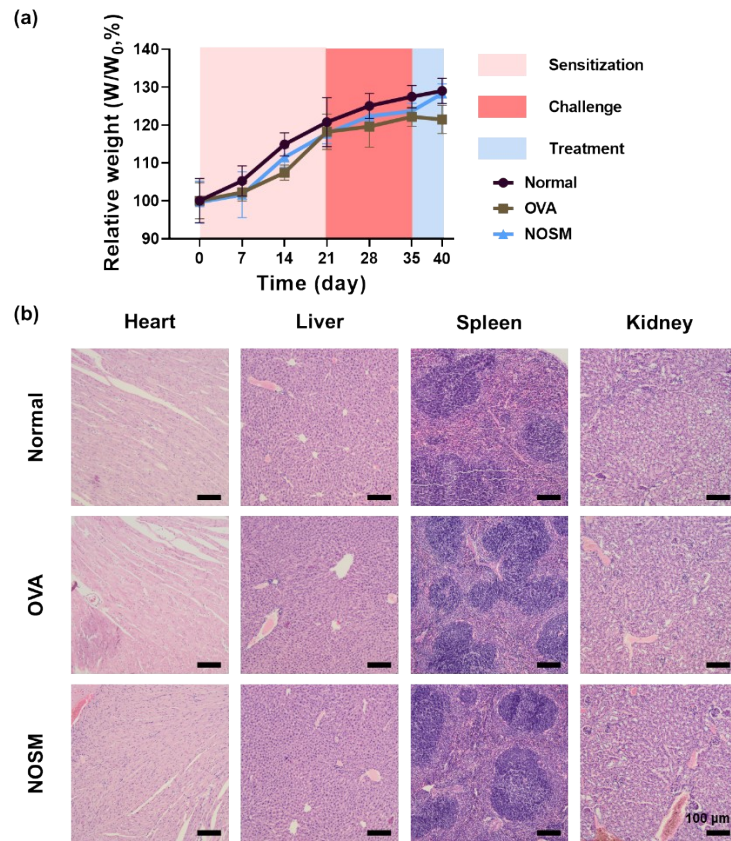

**Figure S7.** (a) Body weight change curves of Balb/C mice after various treatment (b) H&E staining of organs in mice after different treatment. Scale bar 100  $\mu$ m.
